# Supplementary material for: Epidemiology of injuries among children and adolescents from the Xinglin District in Xiamen, 2016–2019
Source: Frontiers journal article supplement (doi:10.3389/fped.2024.1387761), 2024-09-02
Supplement: Data_Sheet_1.pdf [file Data_Sheet_1.pdf]

**Table S1.** Characteristics of the injuries among children and adolescents.

|                                          | 0-4 years old | 5-9 years old | 10-14 years old | 15-18 years old | P      |
|------------------------------------------|---------------|---------------|-----------------|-----------------|--------|
|                                          | N=4834        | N=3924        | N=2671          | N=1694          |        |
| <b>Intention</b>                         |               |               |                 |                 | <0.001 |
| Unintentional accidents                  | 4689 (97.00%) | 3804 (96.94%) | 2524 (94.50%)   | 1526 (90.08%)   |        |
| Adding insult to injury                  | 103 (2.13%)   | 100 (2.55%)   | 130 (4.87%)     | 143 (8.44%)     |        |
| Other                                    | 42 (0.87%)    | 20 (0.51%)    | 17 (0.63%)      | 25 (1.47%)      |        |
| Uncertainty of intent                    | 41 (0.85%)    | 18 (0.46%)    | 14 (0.52%)      | 9 (0.53%)       |        |
| Intentional self-harm                    | 1 (0.02%)     | 2 (0.05%)     | 3 (0.11%)       | 16 (0.94%)      |        |
| <b>Body parts involved in the injury</b> |               |               |                 |                 | <0.001 |
| Head                                     | 1988 (41.13%) | 1079 (27.50%) | 436 (16.32%)    | 305 (18.00%)    |        |
| Upper extremities                        | 1539 (31.84%) | 1275 (32.49%) | 1077 (40.32%)   | 621 (36.66%)    |        |
| Lower extremities                        | 559 (11.56%)  | 907 (23.11%)  | 777 (29.09%)    | 469 (27.69%)    |        |
| Trunk                                    | 157 (3.25%)   | 184 (4.69%)   | 148 (5.54%)     | 81 (4.78%)      |        |

|                                                        | 0-4 years old | 5-9 years old | 10-14 years old | 15-18 years old | P      |
|--------------------------------------------------------|---------------|---------------|-----------------|-----------------|--------|
| Widespread injuries throughout the body/multiple sites | 49 (1.01%)    | 61 (1.55%)    | 57 (2.13%)      | 83 (4.90%)      |        |
| Multiple sites                                         | 47 (0.97%)    | 58 (1.48%)    | 52 (1.95%)      | 74 (4.37%)      |        |
| Widespread injuries throughout the body                | 2 (0.04%)     | 3 (0.08%)     | 5 (0.19%)       | 9 (0.53%)       |        |
| Other                                                  | 431 (8.92%)   | 393 (10.02%)  | 167 (6.25%)     | 120 (7.08%)     |        |
| Unknown                                                | 111 (2.30%)   | 25 (0.64%)    | 9 (0.34%)       | 15 (0.89%)      |        |
| <b>Body system(s) involved in injury</b>               |               |               |                 |                 | <0.001 |
| Respiratory system                                     | 261 (5.40%)   | 109 (2.78%)   | 88 (3.29%)      | 55 (3.25%)      |        |
| Digestive system                                       | 304 (6.29%)   | 171 (4.36%)   | 60 (2.25%)      | 37 (2.18%)      |        |
| Motor system                                           | 1903 (39.37%) | 1950 (49.69%) | 1725 (64.58%)   | 1027 (60.63%)   |        |
| Central nervous system                                 | 1087 (22.49%) | 684 (17.43%)  | 276 (10.33%)    | 182 (10.74%)    |        |
| Other                                                  | 1080 (22.34%) | 900 (22.94%)  | 464 (17.37%)    | 312 (18.42%)    |        |
| Unknown                                                | 138 (2.85%)   | 67 (1.71%)    | 28 (1.05%)      | 25 (1.48%)      |        |
| Genitourinary system/multiple systems                  | 61 (1.26%)    | 43 (1.10%)    | 30 (1.12%)      | 56 (3.31%)      |        |

|                                                         | 0-4 years old | 5-9 years old | 10-14 years old | 15-18 years old | P      |
|---------------------------------------------------------|---------------|---------------|-----------------|-----------------|--------|
| Multiple systems                                        | 49 (1.01%)    | 31 (0.79%)    | 25 (0.94%)      | 50 (2.95%)      |        |
| Genitourinary system                                    | 12 (0.25%)    | 12 (0.31%)    | 5 (0.19%)       | 6 (0.35%)       |        |
| <b>Nature of injury</b>                                 |               |               |                 |                 | <0.001 |
| Contusions, abrasions                                   | 1767 (36.55%) | 1337 (34.07%) | 850 (31.82%)    | 526 (31.05%)    |        |
| Fracture                                                | 348 (7.20%)   | 494 (12.59%)  | 486 (18.20%)    | 187 (11.04%)    |        |
| Cerebral concussion, cerebral contusion, and laceration | 237 (4.90%)   | 174 (4.43%)   | 61 (2.28%)      | 53 (3.13%)      |        |
| Internal organs injuries                                | 48 (0.99%)    | 42 (1.07%)    | 28 (1.05%)      | 19 (1.12%)      |        |
| Sprains/Strains                                         | 682 (14.11%)  | 432 (11.01%)  | 428 (16.02%)    | 262 (15.47%)    |        |
| Other                                                   | 33 (0.68%)    | 16 (0.41%)    | 13 (0.49%)      | 16 (0.94%)      |        |
| sharp instrument injury, bite injury, open injury       | 1518 (31.40%) | 1373 (34.99%) | 770 (28.83%)    | 581 (34.30%)    |        |
| Burns and scalds                                        | 71 (1.47%)    | 26 (0.66%)    | 13 (0.49%)      | 34 (2.01%)      |        |
| Unknown                                                 | 130 (2.69%)   | 30 (0.76%)    | 22 (0.82%)      | 16 (0.94%)      |        |
| <b>Severity degree of injuries</b>                      |               |               |                 |                 | <0.001 |

|                                                          | 0-4 years old | 5-9 years old | 10-14 years old | 15-18 years old | P      |
|----------------------------------------------------------|---------------|---------------|-----------------|-----------------|--------|
| Mild                                                     | 2966 (61.36%) | 2018 (51.43%) | 1233 (46.16%)   | 880 (51.95%)    |        |
| Moderate-severe                                          | 1868 (38.65%) | 1906 (48.58%) | 1438 (53.84%)   | 814 (48.06%)    |        |
| Moderate                                                 | 1860 (38.48%) | 1903 (48.50%) | 1435 (53.73%)   | 810 (47.82%)    |        |
| Severe                                                   | 8 (0.17%)     | 3 (0.08%)     | 3 (0.11%)       | 4 (0.24%)       |        |
| <b>Outcomes of injuries</b>                              |               |               |                 |                 | <0.001 |
| Remain in hospital under observation                     | 171(3.54%)    | 69(1.76%)     | 35(1.31%)       | 51(3.01%)       |        |
| Hospital discharge after treatment                       | 4596 (95.08%) | 3802 (96.89%) | 2578 (96.52%)   | 1588 (93.74%)   |        |
| Hospitalization/transfer to another hospital/death/other | 67 (1.38%)    | 53 (1.35%)    | 58 (2.17%)      | 55 (3.25%)      |        |
| Hospitalization                                          | 28 (0.58%)    | 36 (0.92%)    | 43 (1.61%)      | 54 (3.19%)      |        |
| Transfer to another hospital                             | 34 (0.70%)    | 13 (0.33%)    | 14 (0.52%)      | 1 (0.06%)       |        |
| Death                                                    | 2 (0.04%)     | 0             | 0               | 0               |        |
| Other                                                    | 3 (0.06%)     | 4 (0.10%)     | 1 (0.04%)       | 0               |        |

Categorical variables were expressed as n (%) and analyzed using the chi-squared test.

**Table S2.** Causes, locations, and categories of the injuries among children and adolescents.

|                                 | 0-4 years old | 5-9 years old | 10-14 years old | 15-18 years old | P      |
|---------------------------------|---------------|---------------|-----------------|-----------------|--------|
|                                 | n=4834        | n=3924        | n=2671          | n=1694          |        |
| <b>Causes of injuries</b>       |               |               |                 |                 | <0.001 |
| Knife/sharp instrument injuries | 234 (4.84%)   | 272 (6.93%)   | 182 (6.81%)     | 241 (14.23%)    |        |
| Fall down/fall                  | 2667 (55.17%) | 1866 (47.55%) | 1346 (50.39%)   | 514 (30.34%)    |        |
| Animal injuries                 | 420 (8.69%)   | 529 (13.48%)  | 335 (12.54%)    | 147 (8.68%)     |        |
| Blunt instrument injuries       | 836 (17.29%)  | 752 (19.16%)  | 469 (17.56%)    | 456 (26.92%)    |        |
| Non-motorized vehicle accident  | 106 (2.19%)   | 86 (2.19%)    | 69 (2.58%)      | 43 (2.54%)      |        |
| Motor vehicle accident          | 222 (4.59%)   | 258 (6.57%)   | 147 (5.50%)     | 156 (9.21%)     |        |
| Burns and scalds                | 71 (1.47%)    | 22 (0.56%)    | 12 (0.45%)      | 35 (2.07%)      |        |
| Unknown                         | 167 (3.45%)   | 87 (2.22%)    | 81 (3.03%)      | 61 (3.60%)      |        |
| Other (combined)                | 111 (2.3%)    | 52 (1.33%)    | 30 (1.12%)      | 41 (2.42%)      |        |
| Poisoning                       | 30 (0.62%)    | 5 (0.13%)     | 3 (0.11%)       | 11 (0.65%)      |        |

|                                                       | 0-4 years old | 5-9 years old | 10-14 years old | 15-18 years old | P                |
|-------------------------------------------------------|---------------|---------------|-----------------|-----------------|------------------|
| Drowning                                              | 2 (0.04%)     | 0             | 1 (0.04%)       | 1 (0.06%)       |                  |
| Firearm injury                                        | 1 (0.02%)     | 1 (0.03%)     | 0               | 2 (0.12%)       |                  |
| Sexual assault                                        | 2 (0.04%)     | 1 (0.03%)     | 0               | 0               |                  |
| Apnea (suffocation)/suspension                        | 1 (0.02%)     | 0             | 0               | 0               |                  |
| <b>The major categories of unintentional injuries</b> |               |               |                 |                 | <b>&lt;0.001</b> |
| Mechanical injuries                                   | 887 (18.35%)  | 881 (22.45%)  | 530 (19.84%)    | 617 (36.42%)    |                  |
| Fall down/fall                                        | 2516 (52.05%) | 1847 (47.07%) | 1339 (50.13%)   | 516 (30.46%)    |                  |
| Traffic injuries                                      | 318 (6.58%)   | 340 (8.66%)   | 212 (7.94%)     | 196 (11.57%)    |                  |
| Animal injuries                                       | 426 (8.81%)   | 529 (13.48%)  | 333 (12.47%)    | 148 (8.74%)     |                  |
| Human related injuries                                | 233 (4.82%)   | 182 (4.64%)   | 165 (6.18%)     | 133 (7.85%)     |                  |
| Apnea                                                 | 114 (2.36%)   | 28 (0.71%)    | 23 (0.86%)      | 9 (0.53%)       |                  |
| Poisoning                                             | 102 (2.11%)   | 17 (0.43%)    | 13 (0.49%)      | 32 (1.89%)      |                  |
| Burns and scalds                                      | 72 (1.49%)    | 21 (0.54%)    | 13 (0.49%)      | 14 (0.83%)      |                  |

|                                                                          | 0-4 years old | 5-9 years old | 10-14 years old | 15-18 years old | P      |
|--------------------------------------------------------------------------|---------------|---------------|-----------------|-----------------|--------|
| Other (combined with unintentional injuries)                             | 166 (3.43%)   | 79 (2.01%)    | 43 (1.61%)      | 29 (1.71%)      |        |
| Electric current, artificial visible light, ultraviolet light            | 1 (0.02%)     | 1 (0.03%)     | 0               | 3 (0.18%)       |        |
| Drowning                                                                 | 6 (0.12%)     | 6 (0.15%)     | 1 (0.04%)       | 2 (0.12%)       |        |
| Others                                                                   | 159 (3.29%)   | 72 (1.83%)    | 42 (1.57%)      | 24 (1.42%)      |        |
| <b>The subcategories of unintentional injuries</b>                       |               |               |                 |                 | <0.001 |
| Traffic injuries                                                         | 318 (6.58%)   | 340 (8.66%)   | 212 (7.94%)     | 196 (11.57%)    |        |
| Fall down/fall                                                           | 2516 (52.05%) | 1847 (47.07%) | 1339 (50.13%)   | 516 (30.46%)    |        |
| Inanimate mechanical injuries                                            | 885 (18.31%)  | 877 (22.35%)  | 528 (19.77%)    | 617 (36.42%)    |        |
| Animal injuries (animals, excluding humans and plants, venomous animals) | 409 (8.46%)   | 515 (13.12%)  | 315 (11.79%)    | 144 (8.50%)     |        |
| Animal injuries (human)                                                  | 233 (4.82%)   | 182 (4.64%)   | 165 (6.18%)     | 133 (7.85%)     |        |
| Animal injuries (venomous animals)                                       | 17 (0.35%)    | 14 (0.36%)    | 18 (0.67%)      | 4 (0.24%)       |        |
| Apnea                                                                    | 114 (2.36%)   | 28 (0.71%)    | 23 (0.86%)      | 9 (0.53%)       |        |
| Burns and scalds                                                         | 72 (1.49%)    | 21 (0.54%)    | 13 (0.49%)      | 14 (0.83%)      |        |

|                                                               | 0-4 years old | 5-9 years old | 10-14 years old | 15-18 years old | P      |
|---------------------------------------------------------------|---------------|---------------|-----------------|-----------------|--------|
| Poisoning (excluding animals)                                 | 102 (2.11%)   | 17 (0.43%)    | 13 (0.49%)      | 32 (1.89%)      |        |
| Other (combined with injuries)                                | 166 (3.43%)   | 79 (2.01%)    | 43 (1.61%)      | 29 (1.72%)      |        |
| Drowning                                                      | 6 (0.12%)     | 6 (0.15%)     | 1 (0.04%)       | 2 (0.12%)       |        |
| Electric current, artificial visible light, ultraviolet light | 1 (0.02%)     | 1 (0.03%)     | 0               | 3 (0.18%)       |        |
| Others                                                        | 159 (3.29%)   | 72 (1.83%)    | 42 (1.57%)      | 24 (1.42%)      |        |
| <b>Concomitant activities when injuries occurred</b>          |               |               |                 |                 | <0.001 |
| Leisure activities                                            | 2699 (55.83%) | 1819 (46.36%) | 763 (28.57%)    | 389 (22.96%)    |        |
| Unspecified activities                                        | 984 (20.36%)  | 869 (22.15%)  | 601 (22.50%)    | 359 (21.19%)    |        |
| Other types of work                                           | 609 (12.60%)  | 585 (14.91%)  | 510 (19.09%)    | 223 (13.16%)    |        |
| Life activities                                               | 473 (9.78%)   | 287 (7.31%)   | 152 (5.69%)     | 89 (5.25%)      |        |
| Other (combined with activities when injuries occurred)       | 69 (1.43%)    | 364 (9.28%)   | 645 (24.15%)    | 634 (37.43%)    |        |
| Physical activities                                           | 69 (1.43%)    | 364 (9.28%)   | 645 (24.15%)    | 308 (18.18%)    |        |
| Work                                                          | 0             | 0             | 0               | 326 (19.24%)    |        |



|                                                                   | 0-4 years old | 5-9 years old | 10-14 years old | 15-18 years old | P      |
|-------------------------------------------------------------------|---------------|---------------|-----------------|-----------------|--------|
| <b>Injuries related to product quality</b>                        |               |               |                 |                 | <0.001 |
| Used as usual but had a sudden accident                           | 1978 (40.92%) | 1683 (42.89%) | 1245 (46.61%)   | 764 (45.10%)    |        |
| Not sure                                                          | 500 (10.34%)  | 416 (10.60%)  | 259 (9.70%)     | 148 (8.74%)     |        |
| Not filled                                                        | 1612 (33.35%) | 1162 (29.61%) | 677 (25.35%)    | 514 (30.34%)    |        |
| Other (combined with other conditions)                            | 744 (15.39%)  | 663 (16.90%)  | 490 (18.34%)    | 268 (15.82%)    |        |
| Other                                                             | 465 (9.62%)   | 539 (13.74%)  | 420 (15.72%)    | 206 (12.16%)    |        |
| Improper use                                                      | 275 (5.69%)   | 121 (3.08%)   | 70 (2.62%)      | 62 (3.66%)      |        |
| Related to product quality                                        | 4 (0.08%)     | 3 (0.08%)     | 0               | 0               |        |
| <b>The location where the injury occurred</b>                     |               |               |                 |                 | <0.001 |
| At home                                                           | 3352 (69.34%) | 1439 (36.67%) | 546 (20.44%)    | 271 (16.00%)    |        |
| On the streets and highways                                       | 500 (10.34%)  | 549 (13.99%)  | 400 (14.98%)    | 298 (17.59%)    |        |
| At the resident public service facilities                         | 433 (8.96%)   | 555 (14.14%)  | 253 (9.47%)     | 115 (6.79%)     |        |
| At schools, other institutions, and public administration regions | 272 (5.63%)   | 959 (24.44%)  | 912 (34.14%)    | 347 (20.48%)    |        |

|                                                         | 0-4 years old | 5-9 years old | 10-14 years old | 15-18 years old P |
|---------------------------------------------------------|---------------|---------------|-----------------|-------------------|
| At the sports and exercise regions                      | 98 (2.03%)    | 280 (7.14%)   | 471 (17.63%)    | 242 (14.29%)      |
| At the trade and service regions                        | 93 (1.92%)    | 70 (1.78%)    | 40 (1.50%)      | 105 (6.20%)       |
| At unspecified places                                   | 59 (1.22%)    | 27 (0.69%)    | 15 (0.56%)      | 12 (0.71%)        |
| Other (combined the location where the injury occurred) | 27 (0.55%)    | 45 (1.15%)    | 34 (1.27%)      | 304 (17.95%)      |
| In the industry and construction regions                | 20 (0.41%)    | 20 (0.51%)    | 16 (0.60%)      | 298 (17.59%)      |
| At the farms                                            | 1 (0.02%)     | 13 (0.33%)    | 6 (0.22%)       | 4 (0.24%)         |
| At other specially designated regions                   | 6 (0.12%)     | 12 (0.31%)    | 12 (0.45%)      | 2 (0.12%)         |

Categorical variables were expressed as n (%) and analyzed using the chi-squared test.

**Table S3.** Characteristics of patients with fall down/fall injuries.

|                                                                   | 0-4 years old  | 5-9 years old  | 10-14 years old | 15-18 years old | P      |
|-------------------------------------------------------------------|----------------|----------------|-----------------|-----------------|--------|
|                                                                   | n=2516         | n=1847         | n=1339          | n=516           |        |
| <b>Gender</b>                                                     |                |                |                 |                 | <0.001 |
| Male                                                              | 1593 (63.31%)  | 1259 (68.16%)  | 1028 (76.77%)   | 384 (74.42%)    |        |
| Female                                                            | 923 (36.69%)   | 588 (31.84%)   | 311 (23.23%)    | 132 (25.58%)    |        |
| <b>Causes of injuries</b>                                         |                |                |                 |                 |        |
| Unintentional accidents                                           | 2516 (100.00%) | 1847 (100.00%) | 1339 (100.00%)  | 515 (99.81%)    | -      |
| <b>The location where the injury occurred</b>                     |                |                |                 |                 | <0.001 |
| At home                                                           | 1840 (73.13%)  | 631 (34.16%)   | 150 (11.20%)    | 48 (9.30%)      |        |
| At the resident public service facilities                         | 230 (9.14%)    | 284 (15.38%)   | 135 (10.08%)    | 32 (6.20%)      |        |
| At schools, other institutions, and public administration regions | 176 (7.00%)    | 505 (27.34%)   | 524 (39.13%)    | 146 (28.29%)    |        |
| At the sports and exercise regions                                | 75 (2.98%)     | 216 (11.69%)   | 358 (26.74%)    | 170 (32.95%)    |        |
| On the streets and highways                                       | 132 (5.25%)    | 154 (8.34%)    | 137 (10.23%)    | 77 (14.92%)     |        |

|                                                         | 0-4 years old | 5-9 years old | 10-14 years old | 15-18 years old | P      |
|---------------------------------------------------------|---------------|---------------|-----------------|-----------------|--------|
| At the trade and service regions                        | 53 (2.11%)    | 38 (2.06%)    | 22 (1.64%)      | 16 (3.10%)      |        |
| Other (combined the location where the injury occurred) | 10 (0.40%)    | 19 (1.03%)    | 13 (0.97%)      | 27 (5.23%)      |        |
| In the industry and construction regions                | 4 (0.16%)     | 8 (0.43%)     | 6 (0.45%)       | 27 (5.23%)      |        |
| At the farms                                            | 0             | 3 (0.16%)     | 1 (0.07%)       | 0               |        |
| At other specially designated regions                   | 1 (0.04%)     | 5 (0.27%)     | 5 (0.37%)       | 0               |        |
| At unspecified places                                   | 5 (0.20%)     | 3 (0.16%)     | 1 (0.07%)       | 0               |        |
| <b>Concomitant activities when injuries occurred</b>    |               |               |                 |                 | <0.001 |
| Leisure activities                                      | 1462 (58.11%) | 817 (44.23%)  | 316 (23.60%)    | 101 (19.57%)    |        |
| Unspecified activities                                  | 419 (16.65%)  | 350 (18.95%)  | 244 (18.22%)    | 93 (18.02%)     |        |
| Life activities                                         | 237 (9.42%)   | 115 (6.23%)   | 52 (3.88%)      | 20 (3.88%)      |        |
| Physical activities                                     | 57 (2.27%)    | 278 (15.05%)  | 505 (37.71%)    | 214 (41.47%)    |        |
| Other (combined with activities when injuries occurred) | 341 (13.55%)  | 287 (15.54%)  | 222 (16.58%)    | 88 (17.05%)     |        |
| Other types of work                                     | 341 (13.55%)  | 287 (15.54%)  | 222 (16.58%)    | 59 (11.43%)     |        |

|                                          | 0-4 years old | 5-9 years old | 10-14 years old | 15-18 years old | P      |
|------------------------------------------|---------------|---------------|-----------------|-----------------|--------|
| Work                                     | 0             | 0             | 0               | 29 (5.62%)      |        |
| <b>Severity degree of injuries</b>       |               |               |                 |                 | <0.001 |
| Mild                                     | 1412 (56.12%) | 779 (42.18%)  | 491 (36.67%)    | 221 (42.83%)    |        |
| Moderate-severe                          | 1104 (43.88%) | 1068 (57.82%) | 848 (63.33%)    | 295 (57.17%)    |        |
| Moderate                                 | 1103 (43.84%) | 1066 (57.72%) | 847 (63.26%)    | 293 (56.78%)    |        |
| Severe                                   | 1 (0.04%)     | 2 (0.11%)     | 1 (0.07%)       | 2 (0.39%)       |        |
| <b>Body parts involved in the injury</b> |               |               |                 |                 | <0.001 |
| Head                                     | 1360 (54.05%) | 617 (33.41%)  | 172 (12.85%)    | 74 (14.34%)     |        |
| Upper extremities                        | 705 (28.02%)  | 664 (35.95%)  | 640 (47.80%)    | 152 (29.46%)    |        |
| Lower extremities                        | 160 (6.36%)   | 371 (20.09%)  | 417 (31.14%)    | 239 (46.32%)    |        |
| Trunk                                    | 57 (2.27%)    | 56 (3.03%)    | 52 (3.88%)      | 24 (4.65%)      |        |
| Other(combined)                          | 234 (9.30%)   | 139 (7.53%)   | 58 (4.33%)      | 27 (5.23%)      |        |
| Multiple sites                           | 9 (0.36%)     | 18 (0.97%)    | 21 (1.57%)      | 13 (2.52%)      |        |

|                                          | 0-4 years old    | 5-9 years old | 10-14 years old | 15-18 years old P |
|------------------------------------------|------------------|---------------|-----------------|-------------------|
| Widespread injuries throughout the body  | 0                | 1 (0.05%)     | 1 (0.07%)       | 4 (0.78%)         |
| Other                                    | 221 (8.78%)      | 120 (6.50%)   | 36 (2.69%)      | 9 (1.74%)         |
| Unknown                                  | 4 (0.16%)        | 0             | 0               | 1 (0.19%)         |
| <b>Body system(s) involved in injury</b> | <b>&lt;0.001</b> |               |                 |                   |
| Motor system                             | 904 (35.93%)     | 1055 (57.12%) | 1060 (79.16%)   | 402 (77.91%)      |
| Central nervous system                   | 794 (31.56%)     | 429 (23.23%)  | 124 (9.26%)     | 47 (9.11%)        |
| Digestive system                         | 208 (8.27%)      | 85 (4.60%)    | 29 (2.17%)      | 8 (1.55%)         |
| Respiratory system                       | 43 (1.71%)       | 15 (0.81%)    | 23 (1.72%)      | 9 (1.74%)         |
| Other                                    | 517 (20.55%)     | 226 (12.24%)  | 86 (6.42%)      | 35 (6.78%)        |
| Unknown                                  | 45 (1.79%)       | 20 (1.08%)    | 10 (0.75%)      | 7 (1.36%)         |
| Genitourinary system/multiple systems    | 5 (0.20%)        | 17 (0.92%)    | 7 (0.52%)       | 8 (1.55%)         |
| Genitourinary system                     | 1 (0.04%)        | 4 (0.22%)     | 1 (0.07%)       | 1 (0.19%)         |
| Multiple systems                         | 4 (0.16%)        | 13 (0.70%)    | 6 (0.45%)       | 7 (1.36%)         |

|                                                        | 0-4 years old | 5-9 years old | 10-14 years old | 15-18 years old | P      |
|--------------------------------------------------------|---------------|---------------|-----------------|-----------------|--------|
| <b>Nature of injury</b>                                |               |               |                 |                 | <0.001 |
| Contusions, abrasions                                  | 926 (36.80%)  | 565 (30.59%)  | 366 (27.33%)    | 136 (26.36%)    |        |
| Sharp instrument injury, Bite injury, Open injury      | 712 (28.30%)  | 402 (21.77%)  | 171 (12.77%)    | 84 (16.28%)     |        |
| Sprains/Strains                                        | 383 (15.22%)  | 322 (17.43%)  | 329 (24.57%)    | 185 (35.85%)    |        |
| Fracture                                               | 314 (12.48%)  | 434 (23.50%)  | 428 (31.96%)    | 98 (18.99%)     |        |
| Other (combined with injuries)                         | 181 (7.19%)   | 124 (6.71%)   | 45 (3.36%)      | 13 (2.52%)      |        |
| Cerebral concussion, cerebral contusion and laceration | 167 (6.64%)   | 105 (5.68%)   | 29 (2.17%)      | 11 (2.13%)      |        |
| Burns and Scalds                                       | 3 (0.12%)     | 2 (0.11%)     | 1 (0.07%)       | 0               |        |
| Internal organs injuries                               | 2 (0.08%)     | 12 (0.65%)    | 9 (0.67%)       | 1 (0.19%)       |        |
| Other                                                  | 5 (0.20%)     | 4 (0.22%)     | 2 (0.15%)       | 0               |        |
| Unknown                                                | 4 (0.16%)     | 1 (0.05%)     | 4 (0.30%)       | 1 (0.19%)       |        |
| <b>Causes of Injuries</b>                              |               |               |                 |                 | 0.030  |
| Fall down/fall                                         | 2495 (99.17%) | 1821 (98.59%) | 1323 (98.81%)   | 504 (97.67%)    |        |

|                                 | 0-4 years old | 5-9 years old | 10-14 years old | 15-18 years old P |
|---------------------------------|---------------|---------------|-----------------|-------------------|
| Other (combined with injuries)  | 21 (0.83%)    | 26 (1.41%)    | 16 (1.19%)      | 12 (2.33%)        |
| Blunt instrument injuries       | 17 (0.68%)    | 16 (0.87%)    | 12 (0.90%)      | 8 (1.55%)         |
| Non-motorized vehicle accident  | 1 (0.04%)     | 2 (0.11%)     | 1 (0.07%)       | 0                 |
| Motor vehicle accident          | 0             | 0             | 1 (0.07%)       | 2 (0.39%)         |
| Knife/sharp instrument injuries | 1 (0.04%)     | 3 (0.16%)     | 0               | 1 (0.19%)         |
| Unknown                         | 2 (0.08%)     | 5 (0.27%)     | 2 (0.15%)       | 1 (0.19%)         |

Categorical variables were expressed as n (%) and analyzed using the chi-squared test.



**Table S4.** Characteristics of patients with mechanical injuries.

|                               | 0-4 years old | 5-9 years old | 10-14 years old | 15-18 years old | P      |
|-------------------------------|---------------|---------------|-----------------|-----------------|--------|
|                               | n=887         | n=881         | n=530           | n=617           |        |
| <b>Gender</b>                 |               |               |                 |                 | <0.001 |
| Male                          | 589 (66.40%)  | 638 (72.42%)  | 414 (78.11%)    | 498 (80.71%)    |        |
| Female                        | 298 (33.60%)  | 243 (27.58%)  | 116 (21.89%)    | 119 (19.29%)    |        |
| <b>Causes of injuries</b>     |               |               |                 |                 | <0.001 |
| Unintentional accidents       | 879 (99.10%)  | 857 (97.28%)  | 505 (95.28%)    | 565 (91.57%)    |        |
| Intentional accidents         | 8 (0.90%)     | 24 (2.72%)    | 25 (4.72%)      | 52 (8.43%)      |        |
| Intentional self-harm         | 1 (0.11%)     | 1 (0.11%)     | 0               | 4 (0.65%)       |        |
| Adding insult to injury       | 5 (0.56%)     | 22 (2.50%)    | 24 (4.53%)      | 47 (7.62%)      |        |
| Uncertainty of intent         | 2 (0.23%)     | 1 (0.11%)     | 1 (0.19%)       | 1 (0.16%)       |        |
| <b>Types of injuries</b>      |               |               |                 |                 | -      |
| Inanimate mechanical injuries | 885 (99.77%)  | 877 (99.55%)  | 528 (99.62%)    | 617 (100.00%)   |        |

|                                                                   | 0-4 years old | 5-9 years old | 10-14 years old | 15-18 years old | P      |
|-------------------------------------------------------------------|---------------|---------------|-----------------|-----------------|--------|
| Animals/Plants injuries                                           | 2 (0.23%)     | 4 (0.45%)     | 2 (0.38%)       | 0               |        |
| <b>The location where the injury occurred</b>                     |               |               |                 |                 | <0.001 |
| At home                                                           | 622 (70.12%)  | 344 (39.05%)  | 107 (20.19%)    | 80 (12.97%)     |        |
| At the resident public service facilities                         | 77 (8.68%)    | 122 (13.85%)  | 51 (9.62%)      | 31 (5.02%)      |        |
| At schools, other institutions, and public administration regions | 53 (5.98%)    | 274 (31.10%)  | 229 (43.21%)    | 119 (19.29%)    |        |
| At the sports and exercise regions                                | 19 (2.14%)    | 54 (6.13%)    | 87 (16.42%)     | 54 (8.75%)      |        |
| On the streets and highways                                       | 58 (6.54%)    | 44 (4.99%)    | 28 (5.28%)      | 21 (3.40%)      |        |
| Other (combined the location where the injury occurred)           | 58 (6.54%)    | 43 (4.88%)    | 28 (5.28%)      | 312 (50.57%)    |        |
| At the trade and service regions                                  | 29 (3.27%)    | 18 (2.04%)    | 7 (1.32%)       | 62 (10.05%)     |        |
| In the industry and construction regions                          | 11 (1.24%)    | 8 (0.91%)     | 7 (1.32%)       | 243 (39.38%)    |        |
| At the farms                                                      | 0             | 5 (0.57%)     | 3 (0.57%)       | 2 (0.32%)       |        |
| At other specially designated regions                             | 4 (0.45%)     | 6 (0.68%)     | 7 (1.32%)       | 2 (0.32%)       |        |
| At unspecified places                                             | 14 (1.58%)    | 6 (0.68%)     | 4 (0.75%)       | 3 (0.49%)       |        |

|                                                      | 0-4 years old | 5-9 years old | 10-14 years old | 15-18 years old | P      |
|------------------------------------------------------|---------------|---------------|-----------------|-----------------|--------|
| <b>Concomitant activities when injuries occurred</b> |               |               |                 |                 | <0.001 |
| Physical activities                                  | 10 (1.13%)    | 65 (7.38%)    | 103 (19.43%)    | 69 (11.18%)     |        |
| Leisure activities                                   | 519 (58.51%)  | 494 (56.07%)  | 193 (36.42%)    | 126 (20.42%)    |        |
| Life activities*                                     | 97 (10.94%)   | 65 (7.38%)    | 32 (6.04%)      | 26 (4.21%)      |        |
| Unspecified activities                               | 176 (19.84%)  | 131 (14.87%)  | 71 (13.40%)     | 60 (9.72%)      |        |
| Work/Others                                          | 85 (9.58%)    | 126 (14.30%)  | 131 (24.72%)    | 336 (54.30%)    |        |
| Work                                                 | 0             | 0             | 0               | 255 (41.33%)    |        |
| Other types of work                                  | 85 (9.58%)    | 126 (14.30%)  | 131 (24.72%)    | 80 (12.97%)     |        |
| Others                                               | 0             | 0             | 0               | 1 (0.16%)       |        |
| <b>Severity degree of injuries</b>                   |               |               |                 |                 | 0.002  |
| Mild                                                 | 567 (63.92%)  | 549 (62.32%)  | 300 (56.60%)    | 344 (55.75%)    |        |
| Moderate-severe                                      | 320 (36.07%)  | 332 (37.68%)  | 230 (43.40%)    | 273 (44.25%)    |        |
| Moderate                                             | 319 (35.96%)  | 332 (37.68%)  | 230 (43.40%)    | 273 (44.25%)    |        |

|                                                                            | 0-4 years old | 5-9 years old | 10-14 years old | 15-18 years old | P      |
|----------------------------------------------------------------------------|---------------|---------------|-----------------|-----------------|--------|
| Severe                                                                     | 1 (0.11%)     | 0             | 0               | 0               |        |
| <b>Body parts involved in the injury</b>                                   |               |               |                 |                 | <0.001 |
| Head                                                                       | 208 (23.45%)  | 238 (27.01%)  | 115 (21.70%)    | 92 (14.91%)     |        |
| Upper extremities                                                          | 349 (39.35%)  | 241 (27.36%)  | 200 (37.74%)    | 313 (50.73%)    |        |
| Lower extremities                                                          | 143 (16.12%)  | 177 (20.09%)  | 108 (20.38%)    | 108 (17.50%)    |        |
| Trunk                                                                      | 37 (4.17%)    | 41 (4.65%)    | 34 (6.42%)      | 24 (3.89%)      |        |
| Other                                                                      | 126 (14.21%)  | 178 (20.20%)  | 71 (13.40%)     | 72 (11.67%)     |        |
| Widespread injuries throughout the body or multiple sites injuries/unknown | 24 (2.71%)    | 6 (0.68%)     | 2 (0.38%)       | 8 (1.30%)       |        |
| Widespread injuries throughout the body                                    | 0             | 1 (0.11%)     | 0               | 0               |        |
| Multiple sites                                                             | 4 (0.45%)     | 1 (0.11%)     | 1 (0.19%)       | 8 (1.30%)       |        |
| Unknown                                                                    | 20 (2.25%)    | 4 (0.45%)     | 1 (0.19%)       | 0               |        |
| <b>Body system(s) involved in injury</b>                                   |               |               |                 |                 | <0.001 |
| Motor system                                                               | 400 (45.10%)  | 331 (37.57%)  | 264 (49.81%)    | 373 (60.45%)    |        |

|                                                                     | 0-4 years old | 5-9 years old | 10-14 years old | 15-18 years old | P      |
|---------------------------------------------------------------------|---------------|---------------|-----------------|-----------------|--------|
| Central nervous system                                              | 122 (13.75%)  | 134 (15.21%)  | 72 (13.58%)     | 46 (7.46%)      |        |
| Digestive system                                                    | 53 (5.98%)    | 23 (2.61%)    | 8 (1.51%)       | 8 (1.30%)       |        |
| Other                                                               | 279 (31.45%)  | 353 (40.07%)  | 158 (29.81%)    | 155 (25.12%)    |        |
| Respiratory system/genitourinary system/multiple systems or unknown | 33 (3.72%)    | 40 (4.54%)    | 28 (5.28%)      | 35 (5.67%)      |        |
| Respiratory system                                                  | 5 (0.56%)     | 22 (2.50%)    | 20 (3.77%)      | 18 (2.92%)      |        |
| Genitourinary system                                                | 5 (0.56%)     | 2 (0.23%)     | 1 (0.19%)       | 1 (0.16%)       |        |
| Multiple systems                                                    | 3 (0.34%)     | 0             | 3 (0.57%)       | 6 (0.97%)       |        |
| Unknown                                                             | 20 (2.25%)    | 16 (1.82%)    | 4 (0.75%)       | 10 (1.62%)      |        |
| <b>Nature of injury</b>                                             |               |               |                 |                 | <0.001 |
| Sharp instrument injury, bite injury, open injury                   | 363 (40.92%)  | 400 (45.40%)  | 220 (41.51%)    | 306 (49.59%)    |        |
| Contusions, abrasions                                               | 361 (40.70%)  | 371 (42.11%)  | 216 (40.75%)    | 192 (31.12%)    |        |
| Sprains/strains                                                     | 78 (8.79%)    | 40 (4.54%)    | 44 (8.30%)      | 34 (5.51%)      |        |
| Fracture                                                            | 18 (2.03%)    | 27 (3.06%)    | 28 (5.28%)      | 54 (8.75%)      |        |

|                                                         | 0-4 years old | 5-9 years old | 10-14 years old | 15-18 years old | P      |
|---------------------------------------------------------|---------------|---------------|-----------------|-----------------|--------|
| Cerebral concussion, cerebral contusion, and laceration | 18 (2.03%)    | 27 (3.06%)    | 13 (2.45%)      | 10 (1.62%)      |        |
| Other (combined with injuries)                          |               |               |                 |                 |        |
| Burns and scalds                                        | 0             | 3 (0.34%)     | 1 (0.19%)       | 18 (2.92%)      |        |
| Internal organs injuries                                | 18 (2.03%)    | 6 (0.68%)     | 2 (0.38%)       | 0               |        |
| Other                                                   | 6 (0.68%)     | 4 (0.45%)     | 2 (0.38%)       | 1 (0.16%)       |        |
| Unknown                                                 | 25 (2.82%)    | 3 (0.34%)     | 4 (0.75%)       | 2 (0.32%)       |        |
| <b>Causes of injuries</b>                               |               |               |                 |                 | <0.001 |
| Blunt instrument injuries                               | 551 (62.12%)  | 560 (63.56%)  | 312 (58.87%)    | 343 (55.59%)    |        |
| Knife/sharp instrument injuries                         | 219 (24.69%)  | 266 (30.19%)  | 177 (33.40%)    | 236 (38.25%)    |        |
| Unknown                                                 | 42 (4.74%)    | 19 (2.16%)    | 27 (5.09%)      | 13 (2.11%)      |        |
| Other (combined with injuries)                          | 75 (8.46%)    | 36 (4.09%)    | 14 (2.64%)      | 25 (4.05%)      |        |
| Non-motorized vehicle accident                          | 4 (0.45%)     | 1 (0.11%)     | 0               | 0               |        |
| Firearm injury                                          | 0             | 0             | 0               | 1 (0.16%)       |        |

|                        | 0-4 years old | 5-9 years old | 10-14 years old | 15-18 years old | P |
|------------------------|---------------|---------------|-----------------|-----------------|---|
| Motor vehicle accident | 2 (0.23%)     | 3 (0.34%)     | 2 (0.38%)       | 1 (0.16%)       |   |
| Fall down/fall         | 50 (5.64%)    | 19 (2.16%)    | 5 (0.94%)       | 2 (0.32%)       |   |
| Burns and scalds       | 2 (0.23%)     | 0             | 1 (0.19%)       | 18 (2.92%)      |   |
| Other                  | 17 (1.92%)    | 13 (1.48%)    | 6 (1.13%)       | 3 (0.49%)       |   |

Categorical variables were expressed as n (%) and analyzed using the chi-squared test.

## **Supplementary Material 1**

### **ICD10 injury class codes**

V01-X59 Accidents, V01-V99 Traffic accidents, V01-V09 Pedestrians injured in traffic accidents, V10-V19 Cyclists injured in traffic accidents, V20-V29 Motorcyclists injured in traffic accidents, V30-V39 Occupants of three-wheeled motor vehicles injured in traffic accidents, V40-V49 Occupants of automobiles injured in traffic accidents, V50- V59 Passengers of pickup trucks or vans injured in transportation accidents, V60-V69 Occupants of heavy transportation vehicles injured in transportation accidents, V70-V79 Bus passengers injured in transportation accidents, V80-V89 Other land traffic accidents, V90-V94 Water transportation accidents, V95-V97 Aerospace transportation accidents, V98-V99 Other and unspecified transportation accidents W00-X59 Other external causes of injury, W00-W19 Fall down/fall, W20-W49 Exposure to inanimate mechanical forces, W50-W64 Exposure to dynamic mechanical forces, W65-W74 Unintentional drowning and diving, W75-W84 Other unintentional respiratory threats, W85-W99 Exposure to electrical currents, radiation, and extremes of ambient air temperatures and pressures, X00- X09 Exposure to smoke, fire and flame, X10-X19 Exposure to heat and hot substances, X20-X29 Exposure to poisonous plants and animals, X30-X39 Exposure to the forces of nature, X40-X49 Unintentional poisoning due to exposure to poisonous substances, X50-X57 Overexertion, travel, and poverty, X58-X59 Unintentional exposure to other unspecified factors, X60-X84 Intentional self-harm, X85-Y09 Assault, Y10-Y34 Events of Unspecified Intent, Y35-Y36 Legal Interventions and Actions of War, Y85-Y89 External Cause Sequelae of Morbidity and Mortality, and Y90-Y98 Associated with Other Locally Categorized Causes of Morbidity and Mortality; Outcomes of Injury Supplementary Factors are



coded as S00 - S09 Head Injury, S10 - S19 Neck Injuries, S20 - S29 Chest Injuries, S30 - S39 Abdominal, Lower Back, Lumbar Spine, and Pelvic Injuries, S40 - S49 Shoulder and Upper Arm Injuries, S50 - S59 Elbow and Forearm Injuries, S60 - S69 Wrist and Hand Injuries, S70 - S79 Hip and Thigh Injuries, S80 - S89 Knee and Lower Leg Injuries, and S90 - S99 Ankle and Foot Injuries, T00-T07 Multiple site injuries, T08-T14 Unspecified injuries to trunk, extremities, or body parts, T15-T19 Effects of foreign matter entering through natural orifices, T20-T32 Burns and corrosion, T20-T25 Burns and corrosion of external body surfaces according to site specifications, T26-T28 Burns and corrosion confined to the eyes and internal organs, T29-T32 Burns and corrosion of multiple unspecified body parts, T33-T35 Frostbite, T36-T50 Poisoning by drugs, medications, and biological substances, T51-T65 Toxic effects primarily of nonmedicinal substances, T66-T78 Other unspecified external causative effects, T70-T79 Certain early complications of trauma, T90-T98 Sequelae of traumatic injuries, poisonings, and other external causative consequences.

### **ICD10 class codes of iatrogenic injury**

Y40-Y84 Complications of Medical-Surgical Nursing, T80-T88 Outcome Codes, T98.3 Complications of Surgery and Medical Care.

**Supplementary Material 2**

Clinical classifications of the injuries:

| Major categories of injuries |      | Subcategories of injuries                                                   |      |
|------------------------------|------|-----------------------------------------------------------------------------|------|
| injuries category            | Code | Injuries category                                                           | Code |
| mechanical Injuries          | 001  | inanimate mechanical injuries                                               | 03   |
|                              |      | animal injuries (plants)                                                    | 06   |
| fall down/fall               | 002  | fall down/fall                                                              | 02   |
| traffic injuries             | 003  | traffic injuries                                                            | 01   |
| animal injuries              | 004  | animal injuries (animals, excluding humans and plants and venomous animals) | 04   |
|                              |      | animal injuries (venomous animals)                                          | 05   |
| human-related injuries       | 005  | animal injuries (human)                                                     | 07   |
| apnea                        | 006  | apnea                                                                       | 09   |

|                                      |     |
|--------------------------------------|-----|
| poisoning                            | 007 |
| burns and scalds                     | 008 |
| electric current, artificial visible | 009 |
| light, and ultraviolet light         |     |
| drowning                             | 010 |
| heat stroke, frostbite, and          | 011 |
| lightning strikes (natural forces)   |     |
| medical-related injuries             | 012 |
| others                               | 013 |

|                                      |    |
|--------------------------------------|----|
| poisoning (excluding animals)        | 11 |
| burns and scalds                     | 10 |
| electric current, artificial visible | 12 |
| light, and ultraviolet light         |    |
| drowning                             | 08 |
| heat stroke, frostbite, and          | 13 |
| lightning strikes (natural forces)   |    |
| medical-related injuries             | 14 |
| others                               | 15 |

---
